# Supplementary material for: Prominent features of the amino acid mutation landscape in cancer
Source: PubMed Central journal article supplement (PMC5570307; doi:10.1371/journal.pone.0183273), 2017-08-24
Supplement: pone.0183273.s005.pdf [file pone.0183273.s005.pdf]

**S1 Table. Expected and observed mutation frequency for cancer driver genes.** All Filters: entire filtering schema (Alexandrov *et al.*, 2013) applied; No Filtering: none of the filters applied; Seq. Artifact Filter: only mutations defined as sequencing artifacts (Alexandrov *et al.*, 2013) filtered. The expected range of mutation counts for the driver genes in cancers are based on reported mutation frequencies in the cancer genetics field and reported p53 mutation rates (see Methods).

| Gene | Cancer Type      | # of samples | No filtering | All filters | Seq. artifact filter | Expected frequency |
|------|------------------|--------------|--------------|-------------|----------------------|--------------------|
| BRAF | Melanoma         | 396          | 193          | 21          | 193                  | 158–198            |
| IDH1 | Low-Grade Glioma | 217          | 165          | 0           | 149                  | 163–184            |
| IDH1 | AML              | 154          | 14           | 0           | 4                    | 12–18              |
| IDH1 | Glioblastoma     | 98           | 12           | 0           | 11                   | 0–5                |
| TP53 | Colorectum       | 559          | 327          | 157         | 277                  | 242                |
| TP53 | Head and Neck    | 380          | 200          | 101         | 180                  | 162                |
| TP53 | Pancreas         | 113          | 27           | 14          | 25                   | 39                 |
| TP53 | Stomach          | 212          | 83           | 32          | 70                   | 69                 |
| TP53 | Liver            | 88           | 20           | 18          | 19                   | 27                 |
| TP53 | Breast           | 963          | 245          | 125         | 212                  | 220                |
