# Supplementary material for: Prominent features of the amino acid mutation landscape in cancer
Source: PubMed Central journal article supplement (PMC5570307; doi:10.1371/journal.pone.0183273), 2017-08-24
Supplement: pone.0183273.s006.pdf [file pone.0183273.s006.pdf]

**S2 Table. Total nonsynonymous mutation counts by cancer type.** Data was filtered using sequencing artifacts filter and any samples containing only synonymous mutations were eliminated from analysis (see Methods). Calculated is the mean number of nonsynonymous mutations per sample. Pilocytic astrocytoma samples were eliminated from analyses due to low frequency of nonsynonymous mutations.

| Cancer Type           | Total # nonsyn. mutations | # of samples | Mutations per sample |
|-----------------------|---------------------------|--------------|----------------------|
| ALL                   | 1375                      | 141          | 9.7518               |
| AML                   | 1503                      | 151          | 9.9536               |
| Bladder               | 28212                     | 136          | 207.4412             |
| Breast                | 36973                     | 963          | 38.3936              |
| CLL                   | 1525                      | 131          | 11.6412              |
| Cervix                | 5729                      | 38           | 150.7632             |
| Colorectum            | 181751                    | 559          | 325.1360             |
| Esophageal            | 17740                     | 146          | 121.5068             |
| Glioblastoma          | 11336                     | 96           | 118.0833             |
| Low-Grade Glioma      | 17035                     | 216          | 78.8657              |
| Head and Neck         | 44525                     | 380          | 117.1711             |
| Kidney Chromophobe    | 1094                      | 65           | 16.8308              |
| Kidney Clear Cell     | 18936                     | 325          | 58.2646              |
| Kidney Papillary      | 4356                      | 100          | 43.5600              |
| Liver                 | 4921                      | 88           | 55.9205              |
| Lung Adeno            | 156766                    | 660          | 237.5242             |
| Lung Small Cell       | 12631                     | 70           | 180.4429             |
| Lung Squamous         | 48343                     | 176          | 274.6761             |
| Lymphoma B-cell       | 1765                      | 48           | 36.7708              |
| Medulloblastoma       | 1328                      | 97           | 13.6907              |
| Melanoma              | 169273                    | 396          | 427.4571             |
| Myeloma               | 2479                      | 69           | 35.9275              |
| Neuroblastoma         | 3764                      | 210          | 17.9238              |
| Ovary                 | 21032                     | 471          | 44.6539              |
| Pancreas              | 3974                      | 113          | 35.1681              |
| Pilocytic Astrocytoma | 103                       | 47           | 2.1915               |
| Prostate              | 2411                      | 330          | 7.3061               |
| Stomach               | 63650                     | 212          | 300.2358             |
| Thyroid               | 4377                      | 304          | 14.3980              |
| Uterus                | 134100                    | 240          | 558.7500             |
